# Supplementary material for: Evaluating bias-reducing protocols for RNA sequencing library preparation
Source: PubMed Central journal article supplement (PMC4117970; doi:10.1186/1471-2164-15-569), 2014-07-07

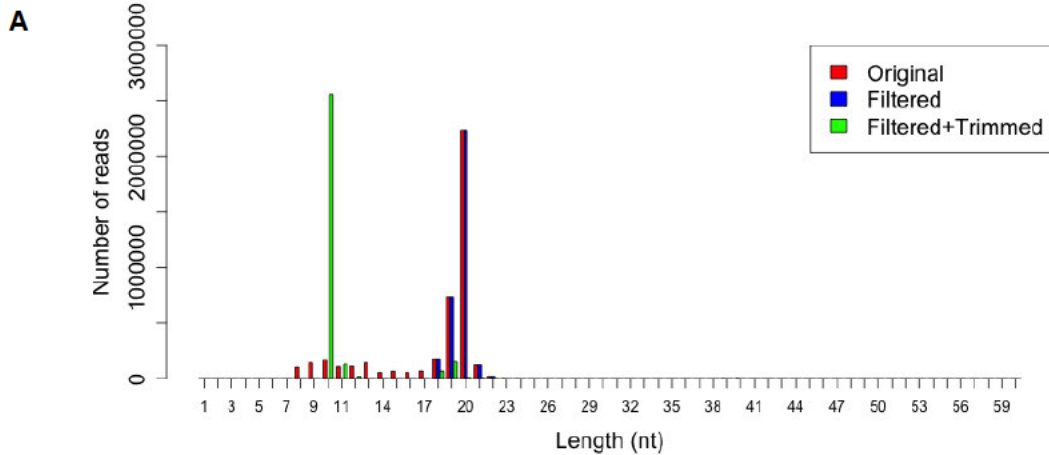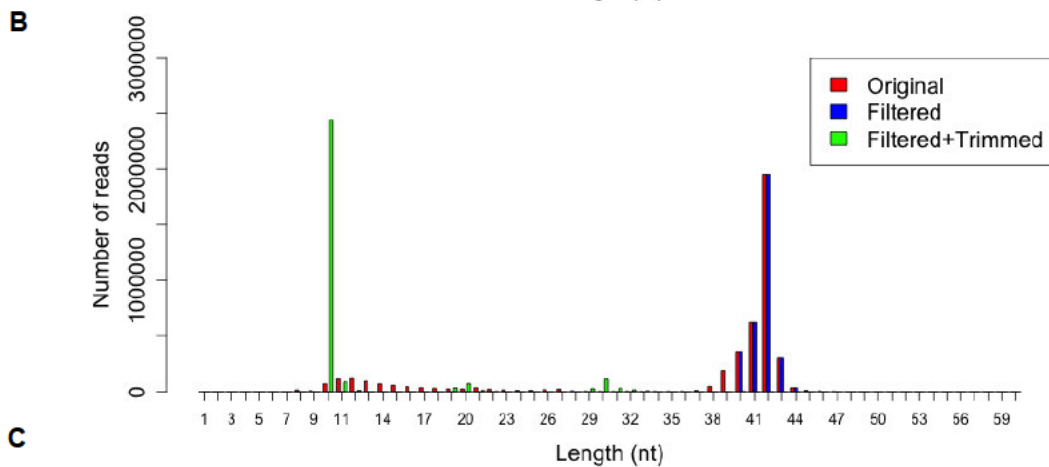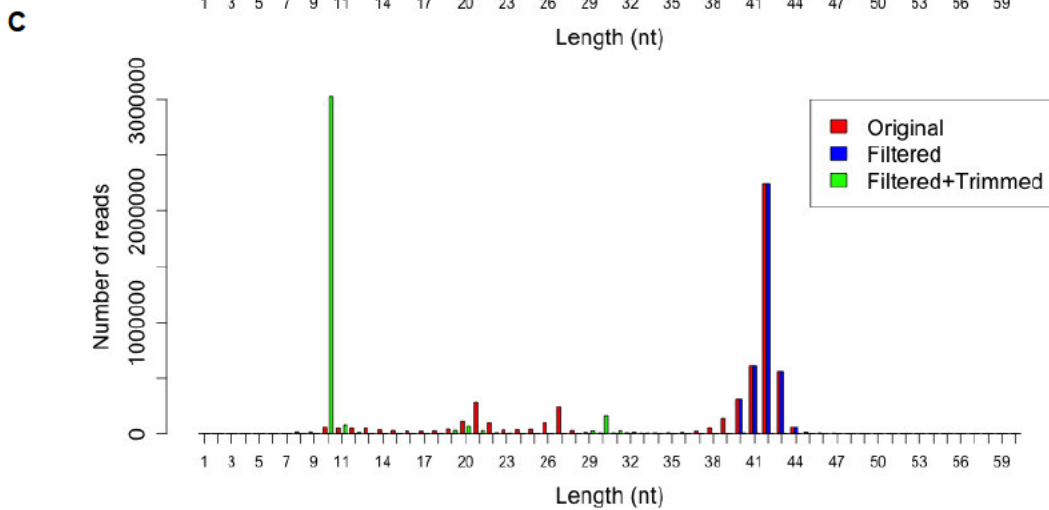

Supplement: 12864_2014_6289_MOESM1_ESM.pdf [file 12864_2014_6289_MOESM1_ESM.pdf]
